# Supplementary material for: Association Between Sleep Duration and Cognitive Decline
Source: PubMed Central journal article supplement (PMC7506513; doi:10.1001/jamanetworkopen.2020.13573), 2020-09-21
Supplement: jamanetwopen-e2013573-s001.pdf [file jamanetwopen-e2013573-s001.pdf]

## Supplementary Online Content

Ma Y, Liang L, Zheng F, Shi L, Zhong B, Xie W. Association between sleep duration and cognitive decline. *JAMA Netw Open*. 2020;3(9):e2013573.  
doi:10.1001/jamanetworkopen.2020.13573

### **eMethods.** Supplemental Methods

**eTable 1.** Association Between Sleep Duration per Night and Memory Function at Baseline

**eTable 2.** Association Between Sleep Duration per Night and Executive Function at Baseline

**eTable 3.** Association Between Sleep Duration per Night and Orientation Function at Baseline

**eTable 4.** Association Between Sleep Duration and Memory Decline (SD/year) During Follow-up

**eTable 5.** Association Between Sleep Duration and Executive Decline (SD/year) During Follow-up

**eTable 6.** Association Between Sleep Duration and Orientation Decline (SD/year) During Follow-up

**eTable 7.** Comparison of Baseline Characteristics Between Participants Included (n=9254) and Excluded From the ELSA, Due to Loss to Follow-up (n=1215)

**eTable 8.** Comparison of Baseline Characteristics Between the Participants Included (n=10 811) and Excluded From the CHARLS Due to Loss to Follow-up (n=1264)

**eTable 9.** Association Between Sleep Duration per Night and Global Cognitive Function at Baseline in Men

**eTable 10.** Association Between Sleep Duration per Night and Memory Function at Baseline in Men

**eTable 11.** Association Between Sleep Duration per Night and Executive Function at Baseline in Men

**eTable 12.** Association Between Sleep Duration per Night and Orientation Function at Baseline in Men

**eTable 13.** Association Between Sleep Duration per Night and Global Cognitive Function at Baseline in Women

**eTable 14.** Association Between Sleep Duration per Night and Memory Function at Baseline in Women

**eTable 15.** Association Between Sleep Duration per Night and Executive Function at Baseline in Women

**eTable 16.** Association Between Sleep Duration per Night and Orientation Function at Baseline in Women

**eTable 17.** Association Between Sleep Duration and Global Cognitive Decline (SD/year) During Follow-up in Men

**eTable 18.** Association Between Sleep Duration and Memory Decline (SD/year) During Follow-up in Men

**eTable 19.** Association Between Sleep Duration and Executive Decline (SD/year) During Follow-up in Men

**eTable 20.** Association Between Sleep Duration and Orientation Decline (SD/year) During

Follow-up in Men

**eTable 21.** Association Between Sleep Duration and Global Cognitive Decline (SD/year) During Follow-up in Women

**eTable 22.** Association Between Sleep Duration and Memory Decline (SD/year) During Follow-up in Women

**eTable 23.** Association Between Sleep Duration and Executive Decline (SD/year) During Follow-up in Women

**eTable 24.** Association Between Sleep Duration and Orientation Decline (SD/year) During Follow-up in Women

**eFigure 1.** Flow Chart of Participant Selection for This Study

**eFigure 2.** Cross-sectional Associations Between Sleep Duration per Night and Cognitive Functions at Baseline in Men

**eFigure 3.** Cross-sectional Associations Between Sleep Duration per Night and Cognitive Functions at Baseline in Women

**eFigure 4.** Longitudinal Associations Between Sleep Duration per Night and Cognitive Declines During Follow-up in Men

**eFigure 5.** Longitudinal Associations Between Sleep Duration per Night and Cognitive Declines During Follow-up in Women

This supplementary material has been provided by the authors to give readers additional information about their work.

## **eMethods. Supplemental Methods**

### **1. Sleep duration**

In the ELSA, individuals were asked to report “How many hours of sleep do you have on an average week night? (You can tell me to the nearest half hour)”.

In the CHARLS, individuals were asked to report “During the past month, how many hours of actual sleep did you get at night (average hours for one night)? (This may be shorter than the number of hours you spend in bed)”.

### **2. Cognitive assessment**

Cognitive assessment was conducted in face-to-face interviews and covered three domains, memory, executive function and orientation. The ELSA and the CHARLS used the same methods to assess memory and orientation.

#### *2.1 Memory*

The interviewers read out a set of 10 words “at a slow steady rate approximately one word every 2 seconds” and then ask the individual to “recall aloud as many of the words as you can, in any order”. Enough time was allowed to recall, approximately up to 2 minutes. After questions and tests on other aspects, the individuals were again asked to recall the words as many as they could.

#### *2.2 Executive function*

In the ELSA, individuals were asked to “name as many different animals as you can think of” in one minute.

In the CHARLS, individuals were asked to answer “What does 100 minus 7 equal? And 7 from that? And 7 from that? And 7 from that? And 7 from that?” In addition, individuals were requested to see and draw the following picture.

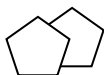

#### *2.3 Orientation*

The individuals were asked to report the “today's date (the day of month, month, year)” and “what day of the week it is today”.

### **3. Covariates**

All the covariates were collected in face-to-face interviews unless otherwise stated.

#### *3.1 Age*

Individuals were asked to report “date of birth”.

#### *3.2 Sex*

Sex were coded with or without asking.

#### *3.3 Education*

In the ELSA, individuals reported their “highest educational qualification” in a self-completion

questionnaire, where education level was classified as no qualification, level 1 national vocational qualification (NVQ) or certificate of secondary education, NVQ2 or general certificate of education (GCE) O-level, NVQ3 or GCE A-level, higher qualification but below degree, and degree level or higher or NVQ4/5. High level of education was defined as  $\geq$  NVQ3 or GCE A-level.

In the CHARLS, individuals reported their “the highest level of education completed” in interview. Education level was classified as no formal education (illiterate), did not finish primary school but capable of reading and/or writing, sishu/home school, elementary school, middle school, high school, vocational school, two-/three-year college/associate degree, four-year college/Bachelor’s degree, Master’s degree, Doctoral degree/Ph.D. High level of education was defined as  $\geq$  high school.

### 3.4 Cohabitation status

Cohabitation status indicated currently living alone or not. Individuals in both cohorts were asked to report their “current legal marital status”. Common-law marriage was considered as married.

In the ELSA, individuals chose from “single (that is never married), married (first and only marriage), a civil partner in a legally-recognized civil partnership, remarried (second or later marriage), legally separated, divorced, and widowed”. Living along was defined as single, legally separated, divorced, or widowed.

In the CHARLS, individuals chose from “married with spouse present, married but not living with spouse temporarily for reasons such as work, separated, divorced, widowed, and never married”. Living along was defined as separated, divorced, widowed, or never married.

### 3.5 The Center for Epidemiologic Studies Depression Scale (CES-D)

The ELSA used an eight-item version of the CES-D. The individuals answered the following eight questions with Yes or No for much of the time during the past week.

- (1) You felt depressed?
- (2) You felt that everything you did was an effort?
- (3) Your sleep was restless?
- (4) You were happy?
- (5) You felt lonely?
- (6) You enjoyed life?
- (7) You felt sad?
- (8) You could not get going?

The CHARLS instead used a ten-item version of the CES-D as below.

- (1) I was bothered by things that don't usually bother me.
- (2) I had trouble keeping my mind on what I was doing.
- (3) I felt depressed.
- (4) I felt everything I did was an effort.
- (5) I felt hopeful about the future.
- (6) I felt fearful.

- (7) My sleep was restless.
- (8) I was happy.
- (9) I felt lonely.
- (10) I could not get "going."

The individuals were asked to choose one of the following responses for each item above that happened during the last week.

- (1) Rarely or none of the time (< 1 day)
- (2) Some or a little of the time (1-2 days)
- (3) Occasionally or a moderate amount of the time (3-4 days)
- (4) Most or all of the time (5-7 days)

### 3.6 *Body mass index*

Body mass index was calculated with interviewer-performed physical examination and the following formula: weight (kg) / height<sup>2</sup> (m<sup>2</sup>).

### 3.7 *Systolic blood pressure*

Systolic blood pressure was the mean of three measures of systolic blood pressure.

### 3.8 *Current smoking*

Individuals were asked to answer "Do you smoke cigarettes at all nowadays" in the ELSA or "Do you still chew tobacco, smoke a pipe, smoke self-rolled cigarettes, or smoke cigarettes/cigars?" in the CHARLS with Yes or No.

### 3.9 *Alcohol consumption*

Individuals in the ELSA chose the frequency of alcoholic drinking in the past 12 months in a self-completion questionnaire. Twice a day or more, daily or almost daily, once or twice a week, once or twice a month, special occasions only, or, not at all?

In the CHARLS, alcohol consuming involved the following three questions:

- (1) How often did you drink liquor, including white liquor, whisky, and others per month in the last year?
- (2) How many times per month did you drink beer in the last year?
- (3) How often did you drink wine or rice wine per month in the last year?

The individuals were asked to choose one of the following responses for each item above.

- (1) Once a month
- (2) 2-3 times a month
- (3) Once a week
- (4) 2-3 times a week
- (5) 4-6 times a week
- (6) Once a day
- (7) Twice a day
- (8) More than twice a day

Alcohol consuming in the CHARLS was defined as at least once a week for whichever of the above three questions.

### *3.10 Diabetes, coronary heart disease, stroke, cancer, asthma, and chronic lung disease*

Individuals were requested to confirm whether they had been told by a doctor that they had the following conditions:

- (1) diabetes (diabetes or high blood sugar)
- (2) coronary heart disease (angina or heart attack in the ELSA; heart attack, coronary heart disease, angina, congestive heart failure, or other heart problems in the CHARLS)
- (3) stroke
- (4) cancer (cancer or malignant tumour)
- (5) asthma
- (6) chronic lung disease (such as chronic bronchitis or emphysema)

In addition, confirmation of current anti-diabetic therapy was included in the definition of diabetes.

**eTable 1. Association between sleep duration per night and memory function at baseline**

| Sleep duration per night, hours | ELSA (n=9254)                       |         | CHARLS (n=10 811)                   |         | Pooled analysis (n=20 065)    |         |                    |         |
|---------------------------------|-------------------------------------|---------|-------------------------------------|---------|-------------------------------|---------|--------------------|---------|
|                                 | LSM of memory Z scores <sup>a</sup> | P value | LSM of memory Z scores <sup>a</sup> | P value | Pooled LSM of memory Z scores | P value | I <sup>2</sup> (%) | P value |
| ≤4                              | -0.18 (-0.27 to -0.09)              | <0.001  | -0.09 (-0.16 to -0.02)              | .009    | -0.13 (-0.22 to -0.04)        | 0.005   | 61.1               | .11     |
| 5                               | -0.13 (-0.20 to -0.06)              | <0.001  | -0.01 (-0.07 to 0.06)               | .88     | -0.06 (-0.18 to 0.05)         | 0.28    | 83.4               | .01     |
| 6                               | -0.06 (-0.11 to -0.01)              | .02     | -0.02 (-0.08 to 0.04)               | .51     | -0.04 (-0.08 to 0.00)         | 0.05    | 15.0               | .28     |
| 7                               | Reference                           | /       | Reference                           | /       | Reference                     | /       | /                  | /       |
| 8                               | -0.09 (-0.14 to -0.05)              | <0.001  | -0.04 (-0.10 to 0.02)               | .18     | -0.07 (-0.12 to -0.02)        | 0.01    | 51.9               | .15     |
| 9                               | -0.18 (-0.26 to -0.09)              | <0.001  | -0.04 (-0.14 to 0.07)               | .51     | -0.11 (-0.25 to 0.03)         | 0.13    | 76.6               | .04     |
| ≥10                             | -0.45 (-0.59 to -0.31)              | <0.001  | -0.14 (-0.24 to -0.04)              | .005    | -0.29 (-0.59 to 0.01)         | 0.06    | 91.6               | .001    |

Abbreviations: ELSA, the English Longitudinal Study of Ageing; CHARLS, the China Health Retirement Longitudinal Study; LSM, least-squares means.

<sup>a</sup> Data are presented as LSM and 95% confidence interval after adjusting for age, sex, education, body mass index, the Center for Epidemiologic Studies Depression Scale score, systolic blood pressure, cohabitation status, current smoking, alcohol consumption, diabetes, coronary heart disease, stroke, cancer, chronic lung disease, and asthma.

**eTable 2. Association between sleep duration per night and executive function at baseline**

| Sleep duration per night, hours | ELSA (n=9254)                          |         | CHARLS (n=10 811)                      |         | Pooled analysis (n=20 065)       |         |                    |         |
|---------------------------------|----------------------------------------|---------|----------------------------------------|---------|----------------------------------|---------|--------------------|---------|
|                                 | LSM of executive Z scores <sup>a</sup> | P value | LSM of executive Z scores <sup>a</sup> | P value | Pooled LSM of executive Z scores | P value | I <sup>2</sup> (%) | P value |
| ≤4                              | -0.12 (-0.21 to -0.02)                 | .02     | -0.19 (-0.25 to -0.13)                 | <0.001  | -0.16 (-0.24 to -0.09)           | <0.001  | 41.8               | .19     |
| 5                               | -0.06 (-0.13 to 0.02)                  | .12     | -0.01 (-0.07 to 0.06)                  | .85     | -0.03 (-0.08 to 0.02)            | 0.28    | 11.6               | .29     |
| 6                               | -0.01 (-0.07 to 0.04)                  | .60     | 0.01 (-0.05 to 0.06)                   | .82     | 0.00 (-0.04 to 0.03)             | 0.84    | 0.0                | .60     |
| 7                               | Reference                              | /       | Reference                              | /       | Reference                        | /       | /                  | /       |
| 8                               | -0.04 (-0.09 to 0.01)                  | .11     | -0.07 (-0.12 to -0.02)                 | .01     | -0.05 (-0.09 to -0.02)           | 0.004   | 0.0                | .43     |
| 9                               | -0.15 (-0.24 to -0.05)                 | .002    | -0.23 (-0.32 to -0.13)                 | <0.001  | -0.18 (-0.26 to -0.10)           | <0.001  | 30.1               | .23     |
| ≥10                             | -0.27 (-0.42 to -0.12)                 | <0.001  | -0.25 (-0.34 to -0.15)                 | <0.001  | -0.25 (-0.33 to -0.17)           | <0.001  | 0.0                | .81     |

Abbreviations: ELSA, the English Longitudinal Study of Ageing; CHARLS, the China Health Retirement Longitudinal Study; LSM, least-squares means.

<sup>a</sup> Data are presented as LSM and 95% confidence interval after adjusting for age, sex, education, body mass index, the Center for Epidemiologic Studies Depression Scale score, systolic blood pressure, cohabitation status, current smoking, alcohol consumption, diabetes, coronary heart disease, stroke, cancer, chronic lung disease, and asthma.



**eTable 3. Association between sleep duration per night and orientation function at baseline**

| Sleep duration per night, hours | ELSA (n=9254)                            |         | CHARLS (n=10 811)                        |         | Pooled analysis (n=20 065)         |         |                    |         |
|---------------------------------|------------------------------------------|---------|------------------------------------------|---------|------------------------------------|---------|--------------------|---------|
|                                 | LSM of orientation Z scores <sup>a</sup> | P value | LSM of orientation Z scores <sup>a</sup> | P value | Pooled LSM of orientation Z scores | P value | I <sup>2</sup> (%) | P value |
| ≤4                              | -0.10 (-0.20 to 0.00)                    | .05     | -0.11 (-0.18 to -0.05)                   | <0.001  | -0.11 (-0.17 to -0.06)             | <0.001  | 0.0                | .85     |
| 5                               | -0.05 (-0.13 to 0.03)                    | .18     | -0.03 (-0.09 to 0.04)                    | .38     | -0.04 (-0.09 to 0.01)              | 0.13    | 0.0                | .62     |
| 6                               | 0.00 (-0.06 to 0.06)                     | .95     | 0.00 (-0.06 to 0.05)                     | .91     | 0.00 (-0.04 to 0.04)               | 0.97    | 0.0                | .90     |
| 7                               | Reference                                | /       | Reference                                | /       | Reference                          | /       | /                  | /       |
| 8                               | -0.07 (-0.12 to -0.01)                   | .01     | -0.03 (-0.09 to 0.02)                    | .24     | -0.05 (-0.09 to -0.01)             | 0.009   | 0.0                | .38     |
| 9                               | -0.16 (-0.26 to -0.06)                   | .001    | -0.19 (-0.29 to -0.09)                   | <0.001  | -0.17 (-0.24 to -0.10)             | <0.001  | 0.0                | .72     |
| ≥10                             | -0.47 (-0.63 to -0.31)                   | <0.001  | -0.26 (-0.36 to -0.17)                   | <0.001  | -0.36 (-0.56 to -0.15)             | 0.001   | 79.7               | .03     |

Abbreviations: ELSA, the English Longitudinal Study of Ageing; CHARLS, the China Health Retirement Longitudinal Study; LSM, least-squares means.

<sup>a</sup> Data are presented as LSM and 95% confidence interval after adjusting for age, sex, education, body mass index, the Center for Epidemiologic Studies Depression Scale score, systolic blood pressure, cohabitation status, current smoking, alcohol consumption, diabetes, coronary heart disease, stroke, cancer, chronic lung disease, and asthma.

**eTable 4. Association between sleep duration and memory decline (SD/year) during follow-up**

| Sleep duration per night, hours | ELSA (n=9254)            |                             | CHARLS (n=10 811)         |                             | Pooled analysis (n=20 065) |                |                           |                |
|---------------------------------|--------------------------|-----------------------------|---------------------------|-----------------------------|----------------------------|----------------|---------------------------|----------------|
|                                 | $\beta$ (95% CI)         | <i>P</i> value <sup>a</sup> | $\beta$ (95% CI)          | <i>P</i> value <sup>a</sup> | Pooled $\beta$ (95% CI)    | <i>P</i> value | <i>R</i> <sup>2</sup> (%) | <i>P</i> value |
| ≤4                              | -0.011 (-0.024 to 0.003) | .12                         | -0.035 (-0.059 to -0.012) | .003                        | -0.021 (-0.045 to 0.003)   | 0.09           | 69.7                      | .07            |
| 5                               | 0.000 (-0.010 to 0.010)  | .99                         | -0.025 (-0.049 to -0.001) | .04                         | -0.010 (-0.034 to 0.014)   | 0.41           | 71.9                      | .06            |
| 6                               | -0.006 (-0.013 to 0.002) | .15                         | -0.019 (-0.040 to 0.002)  | .08                         | -0.009 (-0.019 to 0.002)   | 0.13           | 28.7                      | .24            |
| 7                               | Reference                | /                           | Reference                 | /                           | Reference                  | /              | /                         | /              |
| 8                               | 0.001 (-0.005 to 0.008)  | .68                         | -0.012 (-0.033 to 0.009)  | .26                         | -0.002 (-0.012 to 0.009)   | 0.78           | 31.1                      | .23            |
| 9                               | -0.012 (-0.025 to 0.001) | .07                         | -0.034 (-0.072 to 0.004)  | .08                         | -0.016 (-0.032 to 0.001)   | 0.06           | 16.3                      | .27            |
| ≥10                             | -0.011 (-0.033 to 0.011) | .35                         | -0.041 (-0.078 to -0.005) | .03                         | -0.022 (-0.052 to 0.007)   | 0.14           | 50.1                      | .16            |

Abbreviations: ELSA, the English Longitudinal Study of Ageing; CHARLS, the China Health Retirement Longitudinal Study.

<sup>a</sup> After adjusting for age, sex, education, body mass index, the Center for Epidemiologic Studies Depression Scale score, systolic blood pressure, cohabitation status, current smoking, alcohol consumption, diabetes, coronary heart disease, stroke, cancer, chronic lung disease, and asthma.

**eTable 5. Association between sleep duration and executive decline (SD/year) during follow-up**

| Sleep duration per night, hours | ELSA (n=9254)             |                             | CHARLS (n=10 811)       |                             | Pooled analysis (n=20 065) |                |                           |                |
|---------------------------------|---------------------------|-----------------------------|-------------------------|-----------------------------|----------------------------|----------------|---------------------------|----------------|
|                                 | $\beta$ (95% CI)          | <i>P</i> value <sup>a</sup> | $\beta$ (95% CI)        | <i>P</i> value <sup>a</sup> | Pooled $\beta$ (95% CI)    | <i>P</i> value | <i>R</i> <sup>2</sup> (%) | <i>P</i> value |
| ≤4                              | -0.021 (-0.035 to -0.007) | .003                        | 0.022 (0.006 to 0.038)  | .009                        | 0.000 (-0.042 to 0.043)    | 1.00           | 93.6                      | <0.001         |
| 5                               | -0.011 (-0.022 to 0.000)  | .04                         | 0.000 (-0.017 to 0.017) | .99                         | -0.008 (-0.018 to 0.002)   | 0.14           | 15.4                      | .28            |
| 6                               | -0.005 (-0.013 to 0.003)  | .18                         | 0.012 (-0.003 to 0.026) | .11                         | 0.002 (-0.015 to 0.019)    | 0.80           | 76.3                      | .04            |
| 7                               | Reference                 | /                           | Reference               | /                           | Reference                  | /              | /                         | /              |
| 8                               | -0.009 (-0.016 to -0.002) | .01                         | 0.010 (-0.005 to 0.024) | .19                         | -0.001 (-0.019 to 0.017)   | 0.94           | 80.6                      | .02            |
| 9                               | -0.013 (-0.027 to 0.000)  | .05                         | 0.028 (0.002 to 0.055)  | .04                         | 0.006 (-0.035 to 0.046)    | 0.78           | 86.7                      | .006           |
| ≥10                             | -0.011 (-0.035 to 0.012)  | .33                         | 0.012 (-0.014 to 0.038) | .38                         | -0.001 (-0.023 to 0.022)   | 0.96           | 41.2                      | .19            |

Abbreviations: ELSA, the English Longitudinal Study of Ageing; CHARLS, the China Health Retirement Longitudinal Study.

<sup>a</sup> After adjusting for age, sex, education, body mass index, the Center for Epidemiologic Studies Depression Scale score, systolic blood pressure, cohabitation status, current smoking, alcohol consumption, diabetes, coronary heart disease, stroke, cancer, chronic lung disease, and asthma.

**eTable 6. Association between sleep duration and orientation decline (SD/year) during follow-up**

| Sleep duration per night, hours | ELSA (n=9254)            |                             | CHARLS (n=10 811)        |                             | Pooled analysis (n=20 065) |                |                           |                |
|---------------------------------|--------------------------|-----------------------------|--------------------------|-----------------------------|----------------------------|----------------|---------------------------|----------------|
|                                 | $\beta$ (95% CI)         | <i>P</i> value <sup>a</sup> | $\beta$ (95% CI)         | <i>P</i> value <sup>a</sup> | Pooled $\beta$ (95% CI)    | <i>P</i> value | <i>r</i> <sup>2</sup> (%) | <i>P</i> value |
| ≤4                              | -0.019 (-0.041 to 0.003) | .10                         | -0.020 (-0.041 to 0.001) | .06                         | -0.019 (-0.034 to -0.004)  | 0.01           | 0.0                       | .94            |
| 5                               | -0.001 (-0.018 to 0.016) | .90                         | 0.007 (-0.014 to 0.028)  | .52                         | 0.002 (-0.011 to 0.015)    | 0.76           | 0.0                       | .56            |
| 6                               | -0.002 (-0.014 to 0.010) | .75                         | 0.005 (-0.014 to 0.024)  | .60                         | 0.000 (-0.010 to 0.011)    | 0.98           | 0.0                       | .54            |
| 7                               | Reference                | /                           | Reference                | /                           | Reference                  | /              | /                         | /              |
| 8                               | 0.000 (-0.012 to 0.011)  | .95                         | -0.001 (-0.019 to 0.018) | .93                         | 0.000 (-0.010 to 0.009)    | 0.92           | 0.0                       | .97            |
| 9                               | -0.015 (-0.037 to 0.006) | .17                         | 0.025 (-0.009 to 0.059)  | .15                         | 0.003 (-0.036 to 0.042)    | 0.89           | 73.9                      | .05            |
| ≥10                             | -0.022 (-0.059 to 0.014) | .23                         | -0.017 (-0.049 to 0.016) | .31                         | -0.019 (-0.044 to 0.005)   | 0.12           | 0.0                       | .82            |

Abbreviations: ELSA, the English Longitudinal Study of Ageing; CHARLS, the China Health Retirement Longitudinal Study.

<sup>a</sup> After adjusting for age, sex, education, body mass index, the Center for Epidemiologic Studies Depression Scale score, systolic blood pressure, cohabitation status, current smoking, alcohol consumption, diabetes, coronary heart disease, stroke, cancer, chronic lung disease, and asthma.

**eTable 7. Comparison of baseline characteristics between participants included (n=9254) and excluded from the ELSA, due to loss to follow-up (n=1215)**

| Characteristic                                               | Included (n=9254) | Loss to follow-up (n=1215) | P for difference <sup>a</sup> |
|--------------------------------------------------------------|-------------------|----------------------------|-------------------------------|
| Age (years)                                                  | 64.6±9.8          | 69.0±12.9                  | <0.001                        |
| Male (%)                                                     | 4080 (44.1)       | 553 (45.5)                 | 0.35                          |
| Sleep duration per night, hours (%)                          |                   |                            |                               |
| ≤4                                                           | 442 (4.8)         | 75 (6.2)                   | <0.001                        |
| 5                                                            | 794 (8.6)         | 116 (9.6)                  |                               |
| 6                                                            | 1844 (19.9)       | 243 (20.0)                 |                               |
| 7                                                            | 3011 (32.5)       | 327 (26.9)                 |                               |
| 8                                                            | 2554 (27.6)       | 318 (26.2)                 |                               |
| 9                                                            | 452 (4.9)         | 75 (6.2)                   |                               |
| ≥10                                                          | 157 (1.7)         | 61 (5.0)                   |                               |
| Body mass index (kg/m <sup>2</sup> )                         | 28.4±5.3          | 27.9±5.6                   | 0.004                         |
| Systolic blood pressure (mm Hg)                              | 133.3±18.0        | 134.1±19.8                 | 0.18                          |
| Diastolic blood pressure (mm Hg)                             | 75.2±10.9         | 73.4±12.2                  | <0.001                        |
| High level of education (%)                                  | 3907 (42.2)       | 381 (31.4)                 | <0.001                        |
| The Center for Epidemiologic Studies Depression Scale scores | 1 (0–2)           | 1 (0–3)                    | <0.001                        |
| Depressive symptoms (%)                                      | 1284 (13.9)       | 233 (19.2)                 | <0.001                        |
| Living alone (%)                                             | 2901 (31.4)       | 470 (38.7)                 | <0.001                        |
| Current smoking (%)                                          | 1294 (14.0)       | 208 (17.1)                 | 0.003                         |
| Alcoholic drink ≥once per week (%)                           | 5099 (55.1)       | 470 (38.7)                 | <0.001                        |
| Hypertension (%)                                             | 5019 (54.2)       | 702 (57.8)                 | 0.02                          |
| Diabetes (%)                                                 | 734 (7.9)         | 116 (9.6)                  | 0.05                          |
| Coronary heart disease (%)                                   | 600 (6.5)         | 134 (11.0)                 | <0.001                        |
| Stroke (%)                                                   | 222 (2.4)         | 61 (5.0)                   | <0.001                        |
| Cancer (%)                                                   | 179 (1.9)         | 32 (2.6)                   | 0.10                          |
| Chronic lung disease (%)                                     | 237 (2.6)         | 41 (3.4)                   | 0.10                          |
| Asthma (%)                                                   | 700 (7.6)         | 94 (7.7)                   | 0.83                          |

|                    |          |          |        |
|--------------------|----------|----------|--------|
| Memory scores      | 10.7±3.5 | 8.6±4.1  | <0.001 |
| Executive scores   | 21.2±6.7 | 17.8±7.3 | <0.001 |
| Orientation scores | 4 (4–4)  | 4 (3–4)  | <0.001 |

Data are presented as mean ± SD, n (%), or median (quartile 1–quartile 3).

<sup>a</sup> Calculated by using a t test, chi-square test, or Wilcoxon rank test.

**eTable 8. Comparison of baseline characteristics between the participants included (n=10 811) and excluded from the CHARLS due to loss to follow-up (n=1264)**

| Characteristic                                               | Included (n=10811) | Loss to follow-up (n=1264) | P for difference <sup>a</sup> |
|--------------------------------------------------------------|--------------------|----------------------------|-------------------------------|
| Age (years)                                                  | 57.8±9.0           | 60.5±11.4                  | <0.001                        |
| Male (%)                                                     | 5425 (50.2)        | 664 (52.5)                 | 0.11                          |
| Sleep duration per night, hours (%)                          |                    |                            |                               |
| ≤4                                                           | 1547 (14.3)        | 159 (12.6)                 | 0.11                          |
| 5                                                            | 1423 (13.2)        | 157 (12.4)                 |                               |
| 6                                                            | 2338 (21.6)        | 304 (24.1)                 |                               |
| 7                                                            | 2245 (20.8)        | 252 (19.9)                 |                               |
| 8                                                            | 2416 (22.4)        | 274 (21.7)                 |                               |
| 9                                                            | 402 (3.7)          | 53 (4.2)                   |                               |
| ≥10                                                          | 440 (4.1)          | 65 (5.1)                   |                               |
| Body mass index (kg/m <sup>2</sup> )                         | 23.7±3.7           | 23.5±3.8                   | 0.09                          |
| Systolic blood pressure (mm Hg)                              | 129.7±21.1         | 132.7±22.3                 | <0.001                        |
| Diastolic blood pressure (mm Hg)                             | 76.0±12.1          | 77.4±12.4                  | <0.001                        |
| High level of education (%)                                  | 1501 (13.9)        | 281 (22.2)                 | <0.001                        |
| The Center for Epidemiologic Studies Depression Scale scores | 7 (3–12)           | 6 (3–12)                   | 0.42                          |
| Depressive symptoms (%)                                      | 2722 (25.2)        | 319 (25.2)                 | 0.96                          |
| Living alone (%)                                             | 1069 (9.9)         | 188 (14.9)                 | <0.001                        |
| Current smoking (%)                                          | 4427 (41.0)        | 545 (43.1)                 | 0.14                          |
| Alcoholic drink ≥once per week (%)                           | 1905 (17.6)        | 182 (14.4)                 | 0.004                         |
| Hypertension (%)                                             | 4068 (37.6)        | 522 (41.3)                 | 0.01                          |
| Diabetes (%)                                                 | 615 (5.7)          | 83 (6.6)                   | 0.21                          |
| Coronary heart disease (%)                                   | 1263 (11.7)        | 176 (13.9)                 | 0.02                          |
| Stroke (%)                                                   | 189 (1.8)          | 38 (3.0)                   | 0.002                         |
| Cancer (%)                                                   | 91 (0.8)           | 19 (1.5)                   | 0.02                          |
| Chronic lung disease (%)                                     | 1049 (9.7)         | 158 (12.5)                 | 0.002                         |
| Asthma (%)                                                   | 351 (3.3)          | 56 (4.4)                   | 0.03                          |

|                    |          |          |        |
|--------------------|----------|----------|--------|
| Memory scores      | 15.4±4.7 | 14.7±5.4 | <0.001 |
| Executive scores   | 5 (4–8)  | 5 (4–8)  | 0.84   |
| Orientation scores | 3 (3–4)  | 4 (3–4)  | 0.001  |

Data are presented as mean ± SD, n (%), or median (quartile 1–quartile 3).

<sup>a</sup> Calculated by using a t test, chi-square test, or Wilcoxon rank test.



**eTable 9. Association between sleep duration per night and global cognitive function at baseline in men**

| Sleep duration per night, hours | ELSA (n=4080)                       |         | CHARLS (n=5425)                     |         | Pooled analysis (n=9505)      |         |                    |         |
|---------------------------------|-------------------------------------|---------|-------------------------------------|---------|-------------------------------|---------|--------------------|---------|
|                                 | LSM of global Z scores <sup>a</sup> | P value | LSM of global Z scores <sup>a</sup> | P value | Pooled LSM of global Z scores | P value | I <sup>2</sup> (%) | P value |
| ≤4                              | -0.19 (-0.35 to -0.03)              | .02     | -0.19 (-0.27 to -0.10)              | <0.001  | -0.19 (-0.26 to -0.11)        | <0.001  | 0.0                | .99     |
| 5                               | -0.09 (-0.21 to 0.02)               | .10     | 0.04 (-0.04 to 0.12)                | .35     | -0.02 (-0.15 to 0.11)         | 0.74    | 71.4               | .06     |
| 6                               | -0.03 (-0.11 to 0.05)               | .45     | 0.03 (-0.04 to 0.10)                | .36     | 0.00 (-0.06 to 0.06)          | 0.91    | 26.8               | .24     |
| 7                               | Reference                           | /       | Reference                           | /       | Reference                     | /       | /                  | /       |
| 8                               | -0.07 (-0.14 to 0.00)               | .06     | -0.05 (-0.12 to 0.02)               | .17     | -0.06 (-0.11 to -0.01)        | 0.02    | 0.0                | .69     |
| 9                               | -0.23 (-0.37 to -0.10)              | <0.001  | -0.10 (-0.23 to 0.02)               | .10     | -0.17 (-0.29 to -0.04)        | 0.009   | 45.6               | .18     |
| ≥10                             | -0.25 (-0.48 to -0.03)              | .03     | -0.27 (-0.39 to -0.15)              | <0.001  | -0.26 (-0.37 to -0.16)        | <0.001  | 0.0                | .90     |

Abbreviations: ELSA, the English Longitudinal Study of Ageing; CHARLS, the China Health Retirement Longitudinal Study; LSM, least-squares means.

<sup>a</sup> Data are presented as LSM and 95% confidence interval after adjusting for age, education, body mass index, the Center for Epidemiologic Studies Depression Scale score, systolic blood pressure, cohabitation status, current smoking, alcohol consumption, diabetes, coronary heart disease, stroke, cancer, chronic lung disease, and asthma.

**eTable 10. Association between sleep duration per night and memory function at baseline in men**

| Sleep duration per night, hours | ELSA (n=4080)                       |         | CHARLS (n=5425)                     |         | Pooled analysis (n=9505)      |         |                    |         |
|---------------------------------|-------------------------------------|---------|-------------------------------------|---------|-------------------------------|---------|--------------------|---------|
|                                 | LSM of memory Z scores <sup>a</sup> | P value | LSM of memory Z scores <sup>a</sup> | P value | Pooled LSM of memory Z scores | P value | I <sup>2</sup> (%) | P value |
| ≤4                              | -0.24 (-0.39 to -0.08)              | .003    | -0.04 (-0.13 to 0.06)               | .48     | -0.13 (-0.32 to 0.07)         | 0.21    | 78.5               | .03     |
| 5                               | -0.12 (-0.22 to -0.01)              | .04     | 0.09 (0.00 to 0.18)                 | .06     | -0.01 (-0.21 to 0.19)         | 0.91    | 87.2               | .005    |
| 6                               | -0.09 (-0.17 to -0.02)              | .01     | 0.04 (-0.04 to 0.12)                | .30     | -0.03 (-0.16 to 0.11)         | 0.70    | 83.2               | .02     |
| 7                               | Reference                           | /       | Reference                           | /       | Reference                     | /       | /                  | /       |
| 8                               | -0.06 (-0.13 to 0.01)               | .08     | -0.03 (-0.10 to 0.05)               | .49     | -0.05 (-0.10 to 0.01)         | 0.08    | 0.0                | .52     |
| 9                               | -0.15 (-0.28 to -0.02)              | .03     | 0.07 (-0.07 to 0.22)                | .31     | -0.04 (-0.25 to 0.18)         | 0.73    | 79.8               | .03     |
| ≥10                             | -0.29 (-0.51 to -0.07)              | .009    | -0.19 (-0.33 to -0.05)              | .009    | -0.22 (-0.33 to -0.10)        | <0.001  | 0.0                | .42     |

Abbreviations: ELSA, the English Longitudinal Study of Ageing; CHARLS, the China Health Retirement Longitudinal Study; LSM, least-squares means.

<sup>a</sup> Data are presented as LSM and 95% confidence interval after adjusting for age, education, body mass index, the Center for Epidemiologic Studies Depression Scale score, systolic blood pressure, cohabitation status, current smoking, alcohol consumption, diabetes, coronary heart disease, stroke, cancer, chronic lung disease, and asthma.

**eTable 11. Association between sleep duration per night and executive function at baseline in men**

| Sleep duration per night, hours | ELSA (n=4080)                          |         | CHARLS (n=5425)                        |         | Pooled analysis (n=9505)         |         |                    |         |
|---------------------------------|----------------------------------------|---------|----------------------------------------|---------|----------------------------------|---------|--------------------|---------|
|                                 | LSM of executive Z scores <sup>a</sup> | P value | LSM of executive Z scores <sup>a</sup> | P value | Pooled LSM of executive Z scores | P value | I <sup>2</sup> (%) | P value |
| ≤4                              | 0.01 (-0.16 to 0.18)                   | .94     | -0.22 (-0.30 to -0.14)                 | <0.001  | -0.12 (-0.34 to 0.10)            | 0.29    | 81.8               | .02     |
| 5                               | 0.00 (-0.12 to 0.12)                   | 1.00    | 0.04 (-0.04 to 0.11)                   | .39     | 0.02 (-0.04 to 0.09)             | 0.47    | 0.0                | .64     |
| 6                               | 0.02 (-0.06 to 0.10)                   | .64     | 0.02 (-0.05 to 0.09)                   | .54     | 0.02 (-0.03 to 0.07)             | 0.44    | 0.0                | .98     |
| 7                               | Reference                              | /       | Reference                              | /       | Reference                        | /       | /                  | /       |
| 8                               | 0.02 (-0.06 to 0.09)                   | .68     | -0.05 (-0.11 to 0.02)                  | .15     | -0.02 (-0.08 to 0.04)            | 0.56    | 37.2               | .21     |
| 9                               | -0.13 (-0.27 to 0.02)                  | .08     | -0.16 (-0.28 to -0.04)                 | .01     | -0.15 (-0.24 to -0.05)           | 0.002   | 0.0                | .76     |
| ≥10                             | -0.08 (-0.32 to 0.16)                  | .52     | -0.15 (-0.27 to -0.03)                 | .01     | -0.14 (-0.24 to -0.03)           | 0.01    | 0.0                | .61     |

Abbreviations: ELSA, the English Longitudinal Study of Ageing; CHARLS, the China Health Retirement Longitudinal Study; LSM, least-squares means.

<sup>a</sup> Data are presented as LSM and 95% confidence interval after adjusting for age, education, body mass index, the Center for Epidemiologic Studies Depression Scale score, systolic blood pressure, cohabitation status, current smoking, alcohol consumption, diabetes, coronary heart disease, stroke, cancer, chronic lung disease, and asthma.

**eTable 12. Association between sleep duration per night and orientation function at baseline in men**

| Sleep duration per night, hours | ELSA (n=4080)                            |         | CHARLS (n=5425)                          |         | Pooled analysis (n=9505)           |         |                    |         |
|---------------------------------|------------------------------------------|---------|------------------------------------------|---------|------------------------------------|---------|--------------------|---------|
|                                 | LSM of orientation Z scores <sup>a</sup> | P value | LSM of orientation Z scores <sup>a</sup> | P value | Pooled LSM of orientation Z scores | P value | I <sup>2</sup> (%) | P value |
| ≤4                              | -0.18 (-0.36 to 0.00)                    | .06     | -0.14 (-0.23 to -0.05)                   | .002    | -0.15 (-0.23 to -0.07)             | <0.001  | 0.0                | .74     |
| 5                               | -0.09 (-0.21 to 0.04)                    | .19     | -0.04 (-0.13 to 0.04)                    | .34     | -0.06 (-0.13 to 0.02)              | 0.13    | 0.0                | .57     |
| 6                               | 0.01 (-0.08 to 0.10)                     | .83     | 0.01 (-0.07 to 0.08)                     | .89     | 0.01 (-0.05 to 0.06)               | 0.81    | 0.0                | .93     |
| 7                               | Reference                                | /       | Reference                                | /       | Reference                          | /       | /                  | /       |
| 8                               | -0.10 (-0.18 to -0.02)                   | .01     | -0.03 (-0.10 to 0.05)                    | .48     | -0.06 (-0.13 to 0.01)              | 0.10    | 45.7               | .18     |
| 9                               | -0.22 (-0.38 to -0.07)                   | .005    | -0.14 (-0.27 to 0.00)                    | .04     | -0.17 (-0.27 to -0.07)             | 0.001   | 0.0                | .40     |
| ≥10                             | -0.17 (-0.42 to 0.09)                    | .20     | -0.23 (-0.36 to -0.11)                   | <0.001  | -0.22 (-0.34 to -0.11)             | <0.001  | 0.0                | .65     |

Abbreviations: ELSA, the English Longitudinal Study of Ageing; CHARLS, the China Health Retirement Longitudinal Study; LSM, least-squares means.

<sup>a</sup> Data are presented as LSM and 95% confidence interval after adjusting for age, education, body mass index, the Center for Epidemiologic Studies Depression Scale score, systolic blood pressure, cohabitation status, current smoking, alcohol consumption, diabetes, coronary heart disease, stroke, cancer, chronic lung disease, and asthma.

**eTable 13. Association between sleep duration per night and global cognitive function at baseline in women**

| Sleep duration per night, hours | ELSA (n=5174)                       |         | CHARLS (n=5386)                     |         | Pooled analysis (n=10 560)    |         |                    |         |
|---------------------------------|-------------------------------------|---------|-------------------------------------|---------|-------------------------------|---------|--------------------|---------|
|                                 | LSM of global Z scores <sup>a</sup> | P value | LSM of global Z scores <sup>a</sup> | P value | Pooled LSM of global Z scores | P value | I <sup>2</sup> (%) | P value |
| ≤4                              | -0.19 (-0.30 to -0.08)              | <0.001  | -0.19 (-0.28 to -0.10)              | <0.001  | -0.19 (-0.26 to -0.12)        | <0.001  | 0.0                | .95     |
| 5                               | -0.12 (-0.21 to -0.03)              | .008    | -0.07 (-0.16 to 0.02)               | .12     | -0.10 (-0.16 to -0.03)        | 0.003   | 0.0                | .45     |
| 6                               | -0.04 (-0.11 to 0.03)               | .25     | -0.04 (-0.12 to 0.04)               | .29     | -0.04 (-0.09 to 0.01)         | 0.12    | 0.0                | .96     |
| 7                               | Reference                           | /       | Reference                           | /       | Reference                     | /       | /                  | /       |
| 8                               | -0.11 (-0.18 to -0.05)              | <0.001  | -0.08 (-0.16 to 0.00)               | .05     | -0.10 (-0.15 to -0.05)        | <0.001  | 0.0                | .50     |
| 9                               | -0.22 (-0.33 to -0.10)              | <0.001  | -0.31 (-0.46 to -0.17)              | <0.001  | -0.25 (-0.35 to -0.16)        | <0.001  | 8.5                | .30     |
| ≥10                             | -0.75 (-0.94 to -0.57)              | <0.001  | -0.34 (-0.48 to -0.20)              | <0.001  | -0.54 (-0.95 to -0.14)        | 0.008   | 91.8               | <0.001  |

Abbreviations: ELSA, the English Longitudinal Study of Ageing; CHARLS, the China Health Retirement Longitudinal Study; LSM, least-squares means.

<sup>a</sup> Data are presented as LSM and 95% confidence interval after adjusting for age, education, body mass index, the Center for Epidemiologic Studies Depression Scale score, systolic blood pressure, cohabitation status, current smoking, alcohol consumption, diabetes, coronary heart disease, stroke, cancer, chronic lung disease, and asthma.

**eTable 14. Association between sleep duration per night and memory function at baseline in women**

| Sleep duration per night, hours | ELSA (n=5174)                       |         | CHARLS (n=5386)                     |         | Pooled analysis (n=10 560)    |         |                    |         |
|---------------------------------|-------------------------------------|---------|-------------------------------------|---------|-------------------------------|---------|--------------------|---------|
|                                 | LSM of memory Z scores <sup>a</sup> | P value | LSM of memory Z scores <sup>a</sup> | P value | Pooled LSM of memory Z scores | P value | I <sup>2</sup> (%) | P value |
| ≤4                              | -0.16 (-0.27 to -0.05)              | .006    | -0.14 (-0.24 to -0.05)              | .003    | -0.15 (-0.22 to -0.08)        | <0.001  | 0.0                | .83     |
| 5                               | -0.13 (-0.22 to -0.04)              | .005    | -0.10 (-0.20 to -0.01)              | .04     | -0.12 (-0.18 to -0.05)        | 0.001   | 0.0                | .66     |
| 6                               | -0.04 (-0.11 to 0.03)               | .29     | -0.08 (-0.17 to 0.00)               | .05     | -0.06 (-0.11 to 0.00)         | 0.04    | 0.0                | .41     |
| 7                               | Reference                           | /       | Reference                           | /       | Reference                     | /       | /                  | /       |
| 8                               | -0.12 (-0.18 to -0.05)              | <0.001  | -0.05 (-0.13 to 0.04)               | .27     | -0.09 (-0.16 to -0.02)        | 0.01    | 42.8               | .19     |
| 9                               | -0.19 (-0.31 to -0.08)              | .001    | -0.15 (-0.30 to 0.01)               | .06     | -0.18 (-0.27 to -0.08)        | <0.001  | 0.0                | .64     |
| ≥10                             | -0.55 (-0.74 to -0.37)              | <0.001  | -0.09 (-0.24 to 0.05)               | .21     | -0.32 (-0.77 to 0.13)         | 0.17    | 93.2               | <0.001  |

Abbreviations: ELSA, the English Longitudinal Study of Ageing; CHARLS, the China Health Retirement Longitudinal Study; LSM, least-squares means.

<sup>a</sup> Data are presented as LSM and 95% confidence interval after adjusting for age, education, body mass index, the Center for Epidemiologic Studies Depression Scale score, systolic blood pressure, cohabitation status, current smoking, alcohol consumption, diabetes, coronary heart disease, stroke, cancer, chronic lung disease, and asthma.

**eTable 15. Association between sleep duration per night and executive function at baseline in women**

| Sleep duration per night, hours | ELSA (n=5174)                       |         | CHARLS (n=5386)                     |         | Pooled analysis (n=10 560)    |         |                    |         |
|---------------------------------|-------------------------------------|---------|-------------------------------------|---------|-------------------------------|---------|--------------------|---------|
|                                 | LSM of Global Z scores <sup>a</sup> | P value | LSM of Global Z scores <sup>a</sup> | P value | Pooled LSM of Global Z scores | P value | I <sup>2</sup> (%) | P value |
| ≤4                              | -0.19 (-0.30 to -0.07)              | .001    | -0.17 (-0.26 to -0.08)              | <0.001  | -0.18 (-0.25 to -0.10)        | <0.001  | 0.0                | .79     |
| 5                               | -0.10 (-0.19 to -0.01)              | .04     | -0.04 (-0.13 to 0.05)               | .41     | -0.07 (-0.14 to 0.00)         | 0.04    | 0.0                | .39     |
| 6                               | -0.05 (-0.12 to 0.03)               | .21     | 0.00 (-0.08 to 0.08)                | .98     | -0.03 (-0.08 to 0.03)         | 0.34    | 0.0                | .42     |
| 7                               | Reference                           | /       | Reference                           | /       | Reference                     | /       | /                  | /       |
| 8                               | -0.08 (-0.15 to -0.02)              | .01     | -0.08 (-0.17 to 0.00)               | .05     | -0.08 (-0.14 to -0.03)        | 0.001   | 0.0                | 1.00    |
| 9                               | -0.15 (-0.27 to -0.03)              | .01     | -0.29 (-0.44 to -0.14)              | <0.001  | -0.21 (-0.34 to -0.08)        | 0.002   | 47.1               | .17     |
| ≥10                             | -0.39 (-0.58 to -0.20)              | <0.001  | -0.34 (-0.49 to -0.20)              | <0.001  | -0.36 (-0.47 to -0.24)        | <0.001  | 0.0                | .73     |

Abbreviations: ELSA, the English Longitudinal Study of Ageing; CHARLS, the China Health Retirement Longitudinal Study; LSM, least-squares means.

<sup>a</sup> Data are presented as LSM and 95% confidence interval after adjusting for age, education, body mass index, the Center for Epidemiologic Studies Depression Scale score, systolic blood pressure, cohabitation status, current smoking, alcohol consumption, diabetes, coronary heart disease, stroke, cancer, chronic lung disease, and asthma.

**eTable 16. Association between sleep duration per night and orientation function at baseline in women**

| Sleep duration per night, hours | ELSA (n=5174)                            |         | CHARLS (n=5386)                          |         | Pooled analysis (n=10 560)         |         |                    |         |
|---------------------------------|------------------------------------------|---------|------------------------------------------|---------|------------------------------------|---------|--------------------|---------|
|                                 | LSM of orientation Z scores <sup>a</sup> | P value | LSM of orientation Z scores <sup>a</sup> | P value | Pooled LSM of orientation Z scores | P value | I <sup>2</sup> (%) | P value |
| ≤4                              | -0.06 (-0.19 to 0.06)                    | .31     | -0.08 (-0.18 to 0.01)                    | .08     | -0.08 (-0.15 to 0.00)              | 0.04    | 0.0                | .80     |
| 5                               | -0.03 (-0.13 to 0.07)                    | .52     | -0.01 (-0.11 to 0.08)                    | .79     | -0.02 (-0.09 to 0.05)              | 0.53    | 0.0                | .78     |
| 6                               | 0.00 (-0.08 to 0.07)                     | .93     | -0.01 (-0.09 to 0.08)                    | .87     | -0.01 (-0.06 to 0.05)              | 0.86    | 0.0                | .95     |
| 7                               | Reference                                | /       | Reference                                | /       | Reference                          | /       | /                  | /       |
| 8                               | -0.04 (-0.11 to 0.03)                    | .23     | -0.04 (-0.12 to 0.05)                    | .40     | -0.04 (-0.09 to 0.01)              | 0.14    | 0.0                | .89     |
| 9                               | -0.12 (-0.24 to 0.01)                    | .07     | -0.23 (-0.39 to -0.08)                   | .003    | -0.17 (-0.28 to -0.05)             | 0.004   | 23.7               | .25     |
| ≥10                             | -0.68 (-0.89 to -0.48)                   | <0.001  | -0.29 (-0.44 to -0.15)                   | <0.001  | -0.48 (-0.86 to -0.10)             | 0.01    | 89.3               | .002    |

Abbreviations: ELSA, the English Longitudinal Study of Ageing; CHARLS, the China Health Retirement Longitudinal Study; LSM, least-squares means.

<sup>a</sup> Data are presented as LSM and 95% confidence interval after adjusting for age, education, body mass index, the Center for Epidemiologic Studies Depression Scale score, systolic blood pressure, cohabitation status, current smoking, alcohol consumption, diabetes, coronary heart disease, stroke, cancer, chronic lung disease, and asthma.



**eTable 17. Association between sleep duration and global cognitive decline (SD/year) during follow-up in men**

| Sleep duration per night, hours | ELSA (n=4080)             |                             | CHARLS (n=5425)           |                             | Pooled analysis (n=9505)  |                |                           |                |
|---------------------------------|---------------------------|-----------------------------|---------------------------|-----------------------------|---------------------------|----------------|---------------------------|----------------|
|                                 | $\beta$ (95% CI)          | <i>P</i> value <sup>a</sup> | $\beta$ (95% CI)          | <i>P</i> value <sup>a</sup> | Pooled $\beta$ (95% CI)   | <i>P</i> value | <i>R</i> <sup>2</sup> (%) | <i>P</i> value |
| ≤4                              | -0.034 (-0.064 to -0.003) | .03                         | -0.029 (-0.059 to 0.001)  | .06                         | -0.031 (-0.053 to -0.010) | 0.004          | 0.0                       | .83            |
| 5                               | -0.010 (-0.032 to 0.012)  | .37                         | -0.010 (-0.040 to 0.020)  | .51                         | -0.010 (-0.028 to 0.008)  | 0.26           | 0.0                       | .99            |
| 6                               | 0.001 (-0.013 to 0.016)   | .88                         | -0.004 (-0.030 to 0.022)  | .77                         | 0.000 (-0.013 to 0.013)   | 0.99           | 0.0                       | .74            |
| 7                               | Reference                 | /                           | Reference                 | /                           | Reference                 | /              | /                         | /              |
| 8                               | 0.001 (-0.012 to 0.014)   | .86                         | -0.004 (-0.029 to 0.021)  | .76                         | 0.000 (-0.012 to 0.012)   | 0.99           | 0.0                       | .72            |
| 9                               | -0.011 (-0.037 to 0.016)  | .42                         | -0.005 (-0.052 to 0.041)  | .82                         | -0.009 (-0.032 to 0.013)  | 0.42           | 0.0                       | .84            |
| ≥10                             | -0.039 (-0.085 to 0.007)  | .10                         | -0.050 (-0.095 to -0.005) | .03                         | -0.045 (-0.077 to -0.013) | 0.006          | 0.0                       | .74            |

Abbreviations: ELSA, the English Longitudinal Study of Ageing; CHARLS, the China Health Retirement Longitudinal Study.

<sup>a</sup> After adjusting for age, education, body mass index, the Center for Epidemiologic Studies Depression Scale score, systolic blood pressure, cohabitation status, current smoking, alcohol consumption, diabetes, coronary heart disease, stroke, cancer, chronic lung disease, and asthma.

**eTable 18. Association between sleep duration and memory decline (SD/year) during follow-up in men**

| Sleep duration per night, hours | ELSA (n=4080)            |                             | CHARLS (n=5425)           |                             | Pooled analysis (n=9505) |                |                           |                |
|---------------------------------|--------------------------|-----------------------------|---------------------------|-----------------------------|--------------------------|----------------|---------------------------|----------------|
|                                 | $\beta$ (95% CI)         | <i>P</i> value <sup>a</sup> | $\beta$ (95% CI)          | <i>P</i> value <sup>a</sup> | Pooled $\beta$ (95% CI)  | <i>P</i> value | <i>R</i> <sup>2</sup> (%) | <i>P</i> value |
| ≤4                              | -0.013 (-0.036 to 0.010) | .26                         | -0.037 (-0.071 to -0.002) | .04                         | -0.021 (-0.043 to 0.001) | 0.06           | 20.6                      | .26            |
| 5                               | -0.003 (-0.019 to 0.014) | .76                         | -0.043 (-0.077 to -0.009) | .01                         | -0.020 (-0.059 to 0.019) | 0.32           | 77.3                      | .04            |
| 6                               | 0.000 (-0.011 to 0.011)  | .94                         | -0.026 (-0.056 to 0.003)  | .08                         | -0.009 (-0.035 to 0.016) | 0.47           | 64.3                      | .09            |
| 7                               | Reference                | /                           | Reference                 | /                           | Reference                | /              | /                         | /              |
| 8                               | 0.004 (-0.006 to 0.014)  | .41                         | -0.017 (-0.046 to 0.011)  | .24                         | -0.002 (-0.021 to 0.017) | 0.82           | 47.9                      | .17            |
| 9                               | -0.007 (-0.027 to 0.013) | .48                         | -0.062 (-0.115 to -0.009) | .02                         | -0.029 (-0.082 to 0.024) | 0.28           | 72.6                      | .06            |
| ≥10                             | -0.023 (-0.057 to 0.012) | .19                         | -0.027 (-0.079 to 0.025)  | .30                         | -0.024 (-0.053 to 0.004) | 0.10           | 0.0                       | .89            |

Abbreviations: ELSA, the English Longitudinal Study of Ageing; CHARLS, the China Health Retirement Longitudinal Study.

<sup>a</sup> After adjusting for age, education, body mass index, the Center for Epidemiologic Studies Depression Scale score, systolic blood pressure, cohabitation status, current smoking, alcohol consumption, diabetes, coronary heart disease, stroke, cancer, chronic lung disease, and asthma.

**eTable 19. Association between sleep duration and executive decline (SD/year) during follow-up in men**

| Sleep duration per night, hours | ELSA (n=4080)            |                             | CHARLS (n=5425)          |                             | Pooled analysis (n=9505) |                |                           |                |
|---------------------------------|--------------------------|-----------------------------|--------------------------|-----------------------------|--------------------------|----------------|---------------------------|----------------|
|                                 | $\beta$ (95% CI)         | <i>P</i> value <sup>a</sup> | $\beta$ (95% CI)         | <i>P</i> value <sup>a</sup> | Pooled $\beta$ (95% CI)  | <i>P</i> value | <i>I</i> <sup>2</sup> (%) | <i>P</i> value |
| ≤4                              | -0.015 (-0.040 to 0.010) | .24                         | 0.025 (0.002 to 0.048)   | .03                         | 0.005 (-0.034 to 0.044)  | 0.79           | 81.1                      | .02            |
| 5                               | -0.017 (-0.035 to 0.000) | .05                         | 0.003 (-0.020 to 0.025)  | .81                         | -0.009 (-0.028 to 0.011) | 0.39           | 48.0                      | .17            |
| 6                               | 0.000 (-0.012 to 0.012)  | .99                         | 0.009 (-0.010 to 0.028)  | .36                         | 0.003 (-0.008 to 0.013)  | 0.63           | 0.0                       | .44            |
| 7                               | Reference                | /                           | Reference                | /                           | Reference                | /              | /                         | /              |
| 8                               | -0.008 (-0.019 to 0.002) | .12                         | 0.007 (-0.012 to 0.026)  | .46                         | -0.003 (-0.017 to 0.012) | 0.72           | 48.8                      | .16            |
| 9                               | -0.017 (-0.039 to 0.004) | .11                         | 0.039 (0.003 to 0.074)   | .03                         | 0.009 (-0.046 to 0.063)  | 0.75           | 85.9                      | .008           |
| ≥10                             | -0.035 (-0.072 to 0.003) | .07                         | -0.003 (-0.037 to 0.032) | .89                         | -0.018 (-0.049 to 0.014) | 0.27           | 35.4                      | .21            |

Abbreviations: ELSA, the English Longitudinal Study of Ageing; CHARLS, the China Health Retirement Longitudinal Study.

<sup>a</sup> After adjusting for age, education, body mass index, the Center for Epidemiologic Studies Depression Scale score, systolic blood pressure, cohabitation status, current smoking, alcohol consumption, diabetes, coronary heart disease, stroke, cancer, chronic lung disease, and asthma.

**eTable 20. Association between sleep duration and orientation decline (SD/year) during follow-up in men**

| Sleep duration per night, hours | ELSA (n=4080)                 |         | CHARLS (n=5425)               |         | Pooled analysis (n=9505)  |         |                    |         |
|---------------------------------|-------------------------------|---------|-------------------------------|---------|---------------------------|---------|--------------------|---------|
|                                 | $\beta$ (95% CI) <sup>a</sup> | P value | $\beta$ (95% CI) <sup>a</sup> | P value | Pooled $\beta$ (95% CI)   | P value | I <sup>2</sup> (%) | P value |
| ≤4                              | -0.051 (-0.090 to -0.012)     | .01     | -0.032 (-0.061 to -0.002)     | .04     | -0.039 (-0.062 to -0.015) | 0.001   | 0.0                | .45     |
| 5                               | -0.008 (-0.035 to 0.020)      | .58     | 0.002 (-0.027 to 0.032)       | .88     | -0.003 (-0.023 to 0.017)  | 0.77    | 0.0                | .63     |
| 6                               | 0.002 (-0.017 to 0.020)       | .86     | 0.000 (-0.026 to 0.025)       | .97     | 0.001 (-0.014 to 0.016)   | 0.91    | 0.0                | .89     |
| 7                               | Reference                     | /       | Reference                     | /       | Reference                 | /       | /                  | /       |
| 8                               | 0.009 (-0.008 to 0.026)       | .30     | -0.009 (-0.034 to 0.016)      | .49     | 0.003 (-0.014 to 0.019)   | 0.76    | 25.0               | .25     |
| 9                               | 0.007 (-0.027 to 0.041)       | .69     | 0.012 (-0.034 to 0.058)       | .61     | 0.009 (-0.018 to 0.036)   | 0.53    | 0.0                | .86     |
| ≥10                             | 0.001 (-0.057 to 0.060)       | .96     | -0.043 (-0.087 to 0.002)      | .06     | -0.025 (-0.067 to 0.017)  | 0.25    | 28.0               | .24     |

Abbreviations: ELSA, the English Longitudinal Study of Ageing; CHARLS, the China Health Retirement Longitudinal Study.

<sup>a</sup> After adjusting for age, education, body mass index, the Center for Epidemiologic Studies Depression Scale score, systolic blood pressure, cohabitation status, current smoking, alcohol consumption, diabetes, coronary heart disease, stroke, cancer, chronic lung disease, and asthma.

**eTable 21. Association between sleep duration and global cognitive decline (SD/year) during follow-up in women**

| Sleep duration per night, hours | ELSA (n=5174)             |                             | CHARLS (n=5386)          |                             | Pooled analysis (n=10 560) |                |                           |                |
|---------------------------------|---------------------------|-----------------------------|--------------------------|-----------------------------|----------------------------|----------------|---------------------------|----------------|
|                                 | $\beta$ (95% CI)          | <i>P</i> value <sup>a</sup> | $\beta$ (95% CI)         | <i>P</i> value <sup>a</sup> | Pooled $\beta$ (95% CI)    | <i>P</i> value | <i>R</i> <sup>2</sup> (%) | <i>P</i> value |
| ≤4                              | -0.016 (-0.038 to 0.005)  | .14                         | -0.020 (-0.048 to 0.009) | .17                         | -0.017 (-0.035 to 0.000)   | 0.05           | 0.0                       | .85            |
| 5                               | -0.002 (-0.020 to 0.015)  | .79                         | -0.004 (-0.034 to 0.026) | .78                         | -0.003 (-0.018 to 0.012)   | 0.71           | 0.0                       | .91            |
| 6                               | -0.010 (-0.023 to 0.003)  | .15                         | -0.003 (-0.030 to 0.023) | .82                         | -0.008 (-0.020 to 0.003)   | 0.16           | 0.0                       | .66            |
| 7                               | Reference                 | /                           | Reference                | /                           | Reference                  | /              | /                         | /              |
| 8                               | -0.007 (-0.020 to 0.005)  | .23                         | 0.001 (-0.025 to 0.028)  | .91                         | -0.006 (-0.017 to 0.005)   | 0.30           | 0.0                       | .55            |
| 9                               | -0.033 (-0.055 to -0.010) | .004                        | 0.024 (-0.024 to 0.073)  | .33                         | -0.009 (-0.064 to 0.047)   | 0.76           | 77.1                      | .04            |
| ≥10                             | -0.025 (-0.063 to 0.013)  | .19                         | -0.022 (-0.068 to 0.024) | .36                         | -0.024 (-0.053 to 0.006)   | 0.11           | 0.0                       | .91            |

Abbreviations: ELSA, the English Longitudinal Study of Ageing; CHARLS, the China Health Retirement Longitudinal Study.

<sup>a</sup> After adjusting for age, education, body mass index, the Center for Epidemiologic Studies Depression Scale score, systolic blood pressure, cohabitation status, current smoking, alcohol consumption, diabetes, coronary heart disease, stroke, cancer, chronic lung disease, and asthma.

**eTable 22. Association between sleep duration and memory decline (SD/year) during follow-up in women**

| Sleep duration per night, hours | ELSA (n=5174)            |                             | CHARLS (n=5386)           |                             | Pooled analysis (n=10 560) |                |                           |                |
|---------------------------------|--------------------------|-----------------------------|---------------------------|-----------------------------|----------------------------|----------------|---------------------------|----------------|
|                                 | $\beta$ (95% CI)         | <i>P</i> value <sup>a</sup> | $\beta$ (95% CI)          | <i>P</i> value <sup>a</sup> | Pooled $\beta$ (95% CI)    | <i>P</i> value | <i>I</i> <sup>2</sup> (%) | <i>P</i> value |
| ≤4                              | -0.011 (-0.027 to 0.006) | .20                         | -0.035 (-0.067 to -0.003) | .03                         | -0.019 (-0.041 to 0.003)   | 0.10           | 41.3                      | .19            |
| 5                               | 0.000 (-0.013 to 0.013)  | .97                         | -0.008 (-0.042 to 0.026)  | .64                         | -0.001 (-0.013 to 0.011)   | 0.90           | 0.0                       | .65            |
| 6                               | -0.010 (-0.021 to 0.000) | .04                         | -0.011 (-0.041 to 0.019)  | .47                         | -0.010 (-0.020 to -0.001)  | 0.03           | 0.0                       | .98            |
| 7                               | Reference                | /                           | Reference                 | /                           | Reference                  | /              | /                         | /              |
| 8                               | -0.001 (-0.010 to 0.008) | .84                         | -0.006 (-0.035 to 0.024)  | .71                         | -0.001 (-0.010 to 0.008)   | 0.76           | 0.0                       | .77            |
| 9                               | -0.016 (-0.033 to 0.001) | .06                         | -0.005 (-0.059 to 0.049)  | .86                         | -0.015 (-0.031 to 0.001)   | 0.07           | 0.0                       | .70            |
| ≥10                             | -0.003 (-0.032 to 0.026) | .83                         | -0.056 (-0.108 to -0.004) | .03                         | -0.025 (-0.076 to 0.026)   | 0.34           | 66.9                      | .08            |

Abbreviations: ELSA, the English Longitudinal Study of Ageing; CHARLS, the China Health Retirement Longitudinal Study.

<sup>a</sup> After adjusting for age, education, body mass index, the Center for Epidemiologic Studies Depression Scale score, systolic blood pressure, cohabitation status, current smoking, alcohol consumption, diabetes, coronary heart disease, stroke, cancer, chronic lung disease, and asthma.

**eTable 23. Association between sleep duration and executive decline (SD/year) during follow-up in women**

| Sleep duration per night, hours | ELSA (n=5174)             |                             | CHARLS (n=5386)          |                             | Pooled analysis (n=10 560) |                             |                           |                |
|---------------------------------|---------------------------|-----------------------------|--------------------------|-----------------------------|----------------------------|-----------------------------|---------------------------|----------------|
|                                 | $\beta$ (95% CI)          | <i>P</i> value <sup>a</sup> | $\beta$ (95% CI)         | <i>P</i> value <sup>a</sup> | Pooled $\beta$ (95% CI)    | <i>P</i> value <sup>a</sup> | <i>R</i> <sup>2</sup> (%) | <i>P</i> value |
| ≤4                              | -0.025 (-0.041 to -0.008) | .004                        | 0.018 (-0.006 to 0.042)  | .13                         | -0.004 (-0.046 to 0.038)   | 0.85                        | 88.0                      | .004           |
| 5                               | -0.008 (-0.021 to 0.006)  | .25                         | -0.004 (-0.029 to 0.020) | .72                         | -0.007 (-0.019 to 0.005)   | 0.24                        | 0.0                       | .81            |
| 6                               | -0.010 (-0.020 to 0.001)  | .07                         | 0.015 (-0.007 to 0.037)  | .18                         | 0.001 (-0.023 to 0.024)    | 0.95                        | 74.8                      | .05            |
| 7                               | Reference                 | /                           | Reference                | /                           | Reference                  | /                           | /                         | /              |
| 8                               | -0.009 (-0.019 to 0.000)  | .06                         | 0.013 (-0.009 to 0.034)  | .25                         | -0.001 (-0.022 to 0.021)   | 0.96                        | 69.8                      | .07            |
| 9                               | -0.011 (-0.029 to 0.006)  | .20                         | 0.016 (-0.024 to 0.056)  | .44                         | -0.004 (-0.027 to 0.019)   | 0.74                        | 31.9                      | .23            |
| ≥10                             | 0.004 (-0.026 to 0.033)   | .80                         | 0.025 (-0.014 to 0.064)  | .21                         | 0.012 (-0.012 to 0.035)    | 0.33                        | 0.0                       | .40            |

Abbreviations: ELSA, the English Longitudinal Study of Ageing; CHARLS, the China Health Retirement Longitudinal Study.

<sup>a</sup> After adjusting for age, education, body mass index, the Center for Epidemiologic Studies Depression Scale score, systolic blood pressure, cohabitation status, current smoking, alcohol consumption, diabetes, coronary heart disease, stroke, cancer, chronic lung disease, and asthma.

**eTable 24. Association between sleep duration and orientation decline (SD/year) during follow-up in women**

| Sleep duration per night, hours | ELSA (n=5174)             |                             | CHARLS (n=5386)          |                             | Pooled analysis (n=10 560) |                             |                           |                |
|---------------------------------|---------------------------|-----------------------------|--------------------------|-----------------------------|----------------------------|-----------------------------|---------------------------|----------------|
|                                 | $\beta$ (95% CI)          | <i>P</i> value <sup>a</sup> | $\beta$ (95% CI)         | <i>P</i> value <sup>a</sup> | Pooled $\beta$ (95% CI)    | <i>P</i> value <sup>a</sup> | <i>R</i> <sup>2</sup> (%) | <i>P</i> value |
| ≤4                              | -0.006 (-0.033 to 0.021)  | .65                         | -0.008 (-0.037 to 0.021) | .59                         | -0.007 (-0.027 to 0.013)   | 0.49                        | 0.0                       | .93            |
| 5                               | 0.002 (-0.020 to 0.024)   | .86                         | 0.012 (-0.019 to 0.043)  | .45                         | 0.005 (-0.012 to 0.023)    | 0.56                        | 0.0                       | .60            |
| 6                               | -0.005 (-0.022 to 0.011)  | .54                         | 0.010 (-0.017 to 0.038)  | .46                         | -0.001 (-0.015 to 0.013)   | 0.89                        | 0.0                       | .34            |
| 7                               | Reference                 | /                           | Reference                | /                           | Reference                  | /                           | /                         | /              |
| 8                               | -0.008 (-0.024 to 0.007)  | .30                         | 0.007 (-0.021 to 0.034)  | .63                         | -0.005 (-0.018 to 0.009)   | 0.50                        | 0.0                       | .35            |
| 9                               | -0.032 (-0.060 to -0.004) | .03                         | 0.038 (-0.012 to 0.088)  | .13                         | 0.000 (-0.068 to 0.069)    | 1.00                        | 82.6                      | .02            |
| ≥10                             | -0.041 (-0.088 to 0.006)  | .09                         | 0.010 (-0.038 to 0.058)  | .68                         | -0.016 (-0.066 to 0.035)   | 0.54                        | 55.3                      | .14            |

Abbreviations: ELSA, the English Longitudinal Study of Ageing; CHARLS, the China Health Retirement Longitudinal Study.

<sup>a</sup> After adjusting for age, education, body mass index, the Center for Epidemiologic Studies Depression Scale score, systolic blood pressure, cohabitation status, current smoking, alcohol consumption, diabetes, coronary heart disease, stroke, cancer, chronic lung disease, and asthma.



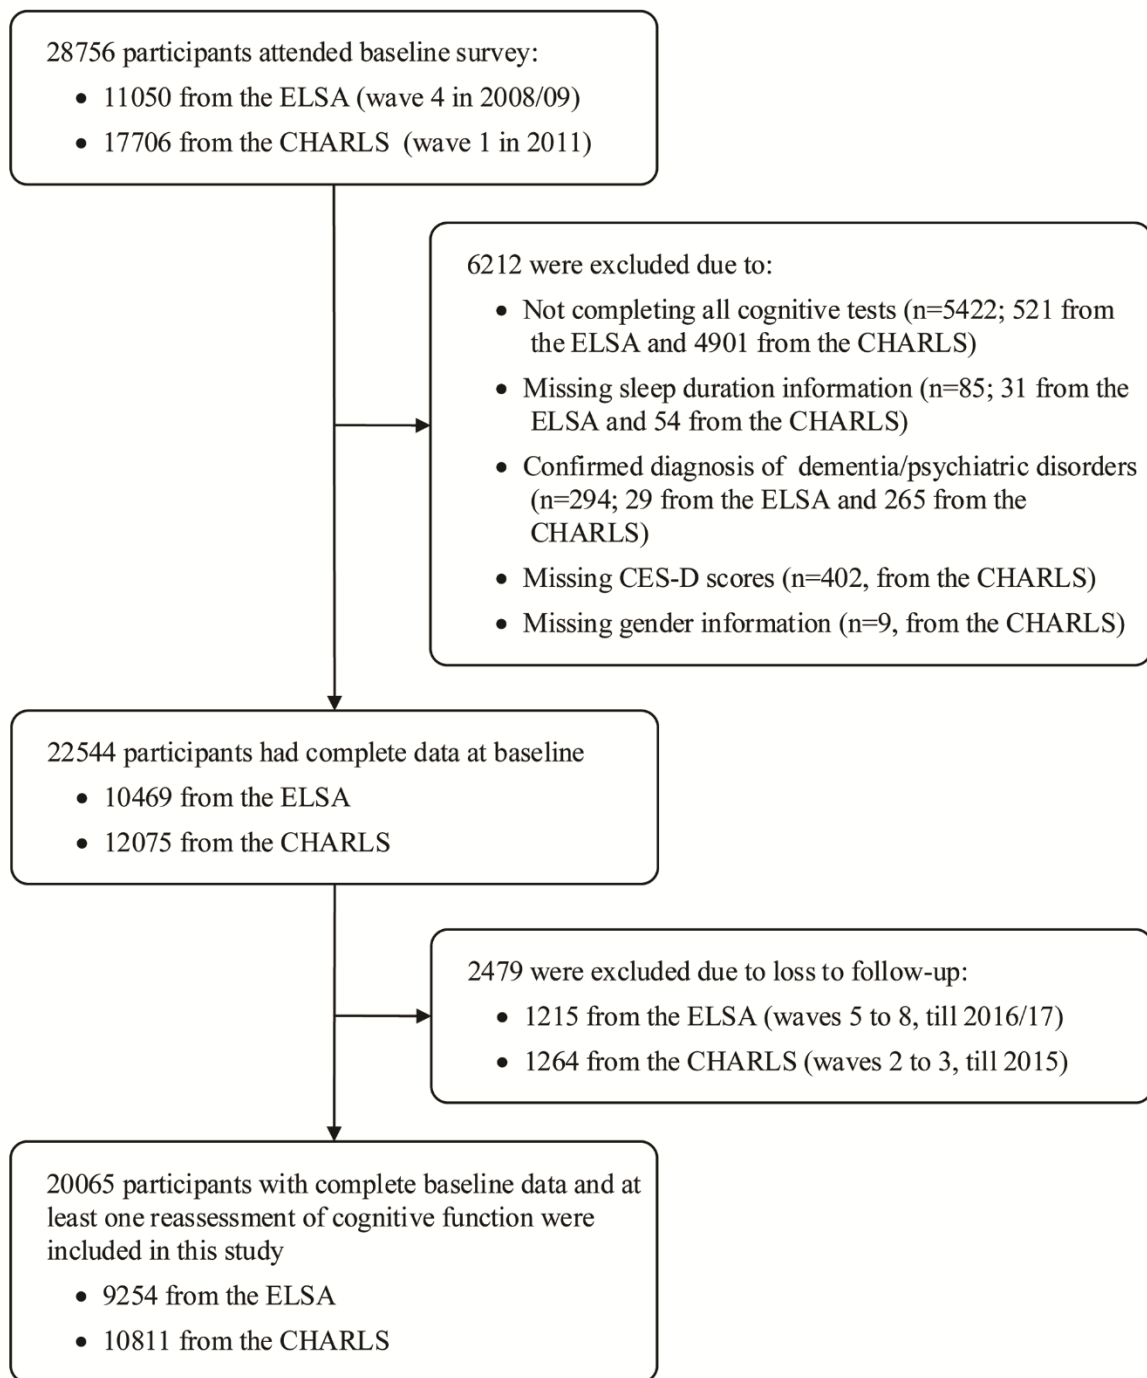

**eFigure 1. Flow chart of participant selection for this study.**

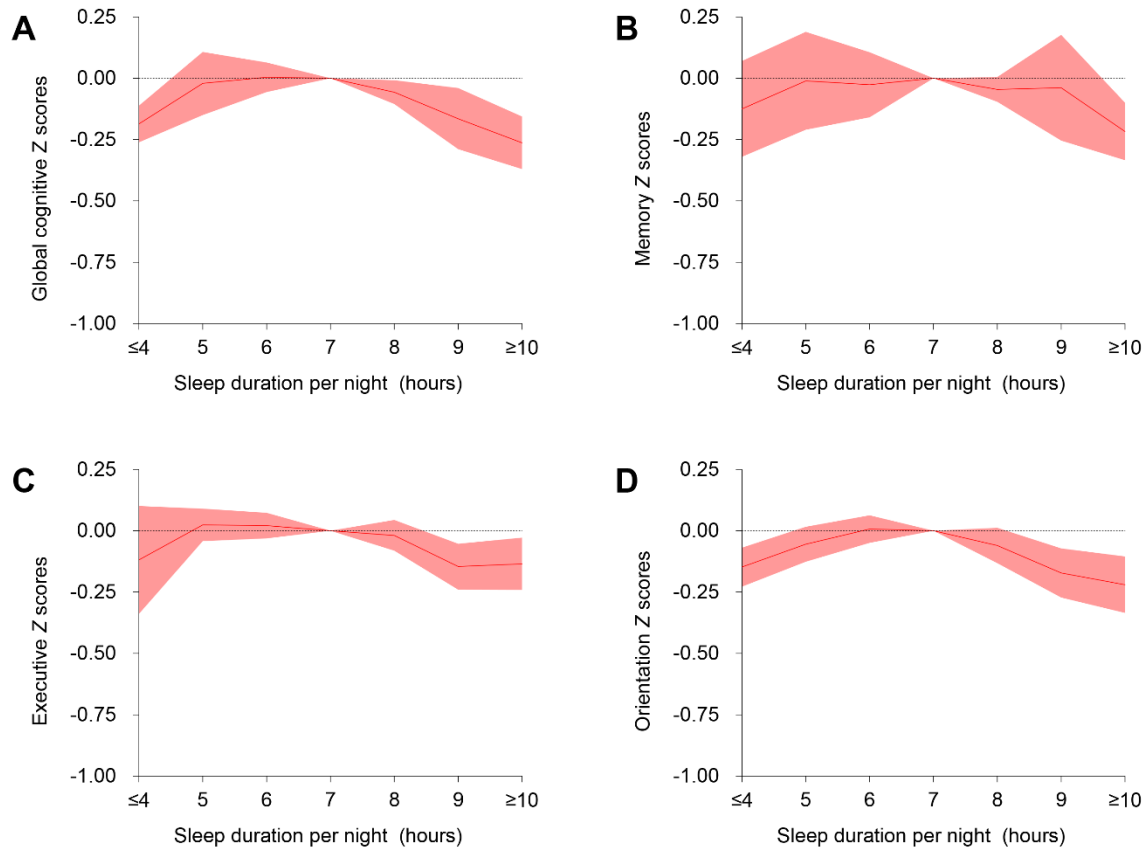

**eFigure 2. Cross-sectional associations between sleep duration per night and cognitive functions at baseline in men: pooled results of two cohorts**

Participants who had a sleep duration of 7 hours per night as the reference group. Solid lines represent adjusted least-squares means after adjusting for age, education, body mass index, the Center for Epidemiologic Studies Depression Scale score, systolic blood pressure, cohabitation status, current smoking, alcohol consumption, diabetes, coronary heart disease, stroke, cancer, chronic lung disease, and asthma. The shadows represent the 95% CIs.

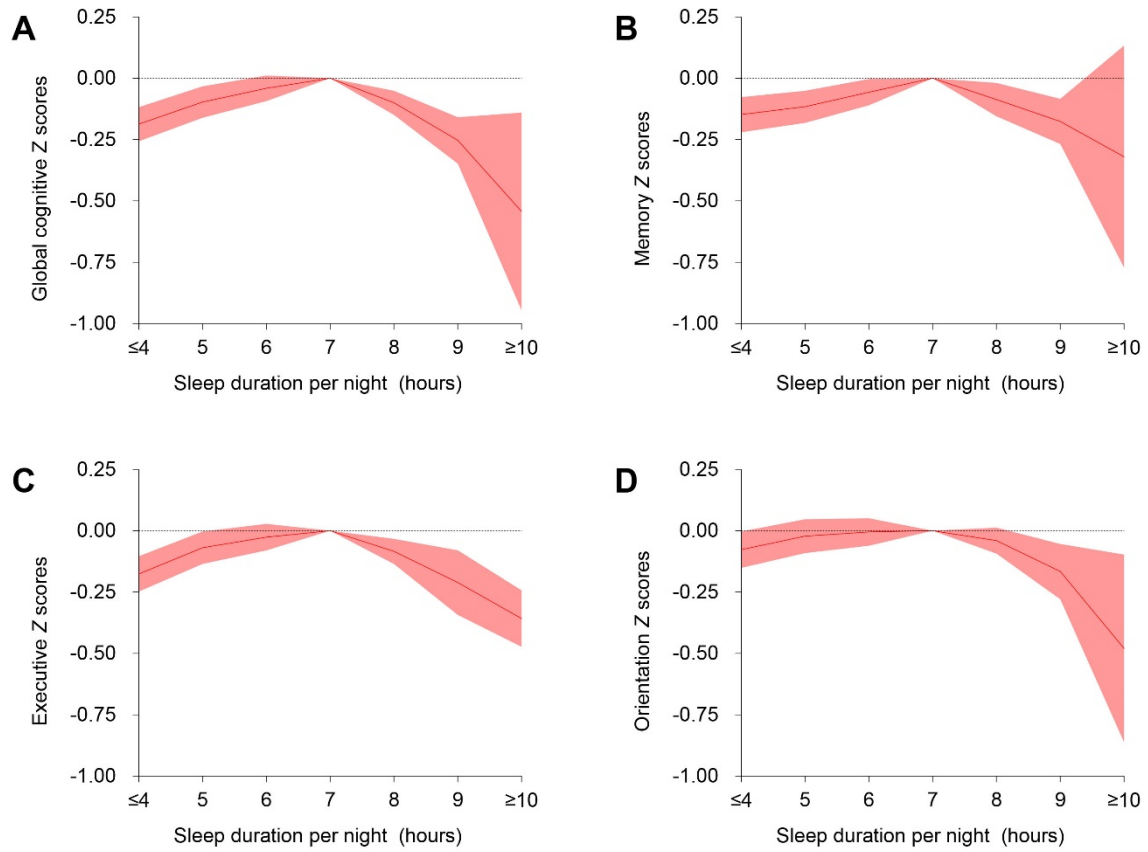

**eFigure 3. Cross-sectional associations between sleep duration per night and cognitive functions at baseline in women: pooled results of two cohorts**

Participants who had a sleep duration of 7 hours per night as the reference group. Solid lines represent adjusted least-squares means after adjusting for age, education, body mass index, the Center for Epidemiologic Studies Depression Scale score, systolic blood pressure, cohabitation status, current smoking, alcohol consumption, diabetes, coronary heart disease, stroke, cancer, chronic lung disease, and asthma. The shadows represent the 95% CIs.

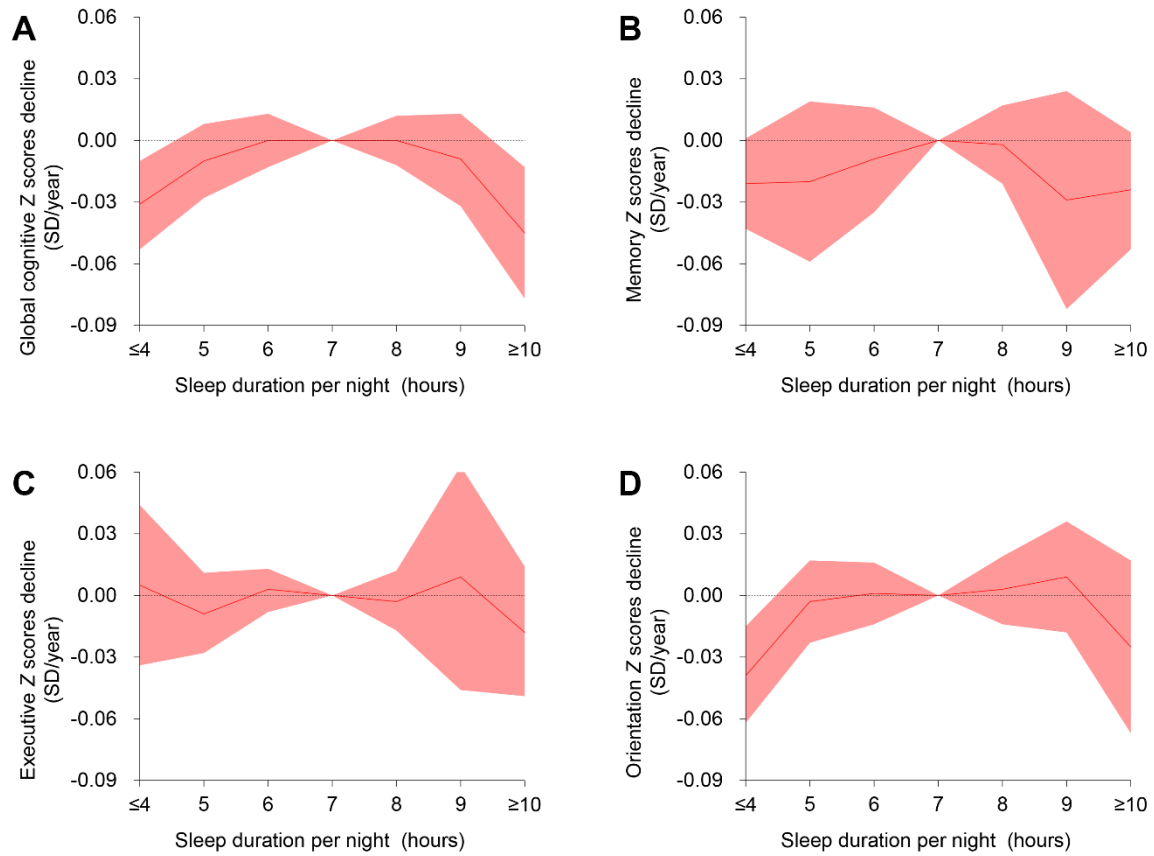

**eFigure 4. Longitudinal associations between sleep duration per night and cognitive declines during follow-up in men: pooled results of two cohorts**

Participants who had a sleep duration of 7 hours per night as the reference group. Solid lines represent adjusted mean differences after adjusting for age, education, body mass index, the Center for Epidemiologic Studies Depression Scale score, systolic blood pressure, cohabitation status, current smoking, alcohol consumption, diabetes, coronary heart disease, stroke, cancer, chronic lung disease, and asthma. The shadows represent the 95% CIs.

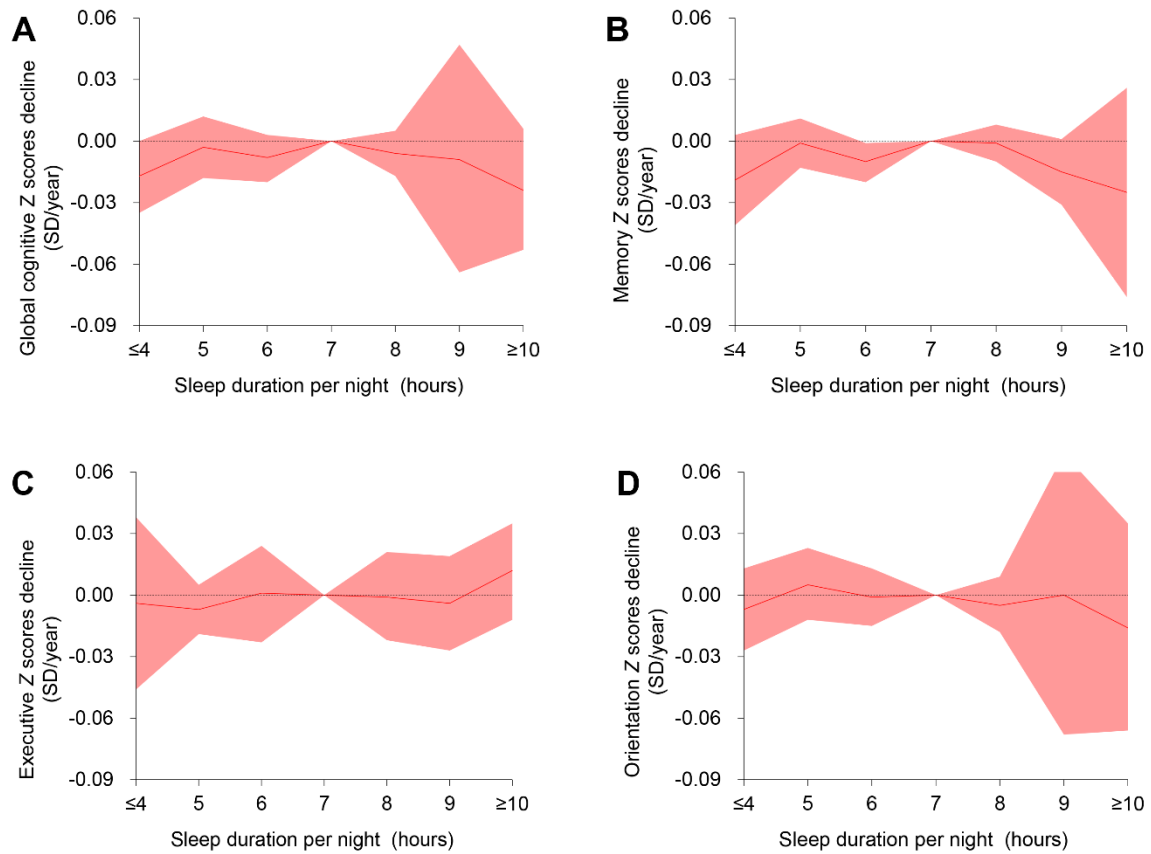

**eFigure 5. Longitudinal associations between sleep duration per night and cognitive declines during follow-up in women: pooled results of two cohorts**

Participants who had a sleep duration of 7 hours per night as the reference group. Solid lines represent adjusted mean differences after adjusting for age, education, body mass index, the Center for Epidemiologic Studies Depression Scale score, systolic blood pressure, cohabitation status, current smoking, alcohol consumption, diabetes, coronary heart disease, stroke, cancer, chronic lung disease, and asthma. The shadows represent the 95% CIs.
